# Supplementary material
Source: PubMed Central journal article supplement (PMC1697799)

**JCI Ref: 28769-RG-RV-2**

**Dias-Santagata *et al.* Oxidative stress mediates tau-induced neurodegeneration in *Drosophila***

## SUPPLEMENTAL DATA

### Figure Legends

**Supplemental Figure S1. Brain vacuolization is present both in the cortex and in the neuropil of tau<sup>R406W</sup>-expressing flies.** Frontal brain sections of 10-day-old flies were stained with H&E. High power magnification photomicrographs highlight regions of vacuolization in the cortex (A, C and E, arrowheads) and in the neuropil (B, D and F, arrows), in tau<sup>R406W</sup>-expressing flies (A and B), and in tau<sup>R406W</sup> transgenic animals heterozygous for either the *Trxr*<sup>Δ1</sup> (C and D) or the *Sod2*<sup>n283</sup> (E and F) null alleles. Partial inactivation of Trxr and Sod2 antioxidant activities enhanced tau-induced neurotoxicity. Scale bar, 10 μm. Genotypes: *elav-GAL4/+; UAS-tau<sup>R406W</sup>/+*, *elav-GAL4/Trxr<sup>Δ1</sup>; UAS-tau<sup>R406W</sup>/+*, *elav-GAL4/+; Sod2<sup>n283</sup>/+*; *UAS-tau<sup>R406W</sup>/+*.

**Supplemental Figure S2. Heterozygosity for *Sod2*<sup>n283</sup> or for *Trxr*<sup>Δ1</sup> is not associated with neurodegeneration.** (A and B) Frontal brain sections of 10-day-old flies heterozygous for the *Trxr*<sup>Δ1</sup> (A) or for the *Sod2*<sup>n283</sup> (B) null alleles were stained with H&E. Scale bar, 20 μm. (C and D) Neurotoxicity in 20-day-old flies was evaluated by quantification of brain vacuolization (C) and TUNEL-positive neurons (D). Expression of

$\tau^{R406W}$  in the fly brain resulted in significant neurodegeneration when compared to controls, as assessed by brain vacuolization ( $p < 0.001$ ) (C) and by neuronal cell death ( $p < 0.001$ ) (D). By contrast, neurotoxicity in 20-day-old flies heterozygous for *Sod2*<sup>n283</sup> or for *Trxr* <sup>$\Delta 1$</sup>  was not significantly different from that of age-matched controls. Genotypes: *elav-GAL4/+*, *elav-GAL4/Trxr* <sup>$\Delta 1$</sup> , *elav-GAL4/+; Sod2*<sup>n283/+</sup> and *elav-GAL4/+; UAS- $\tau^{R406W}/+$* .

**Supplemental Figure S1** (Dias-Santagata *et al.*)

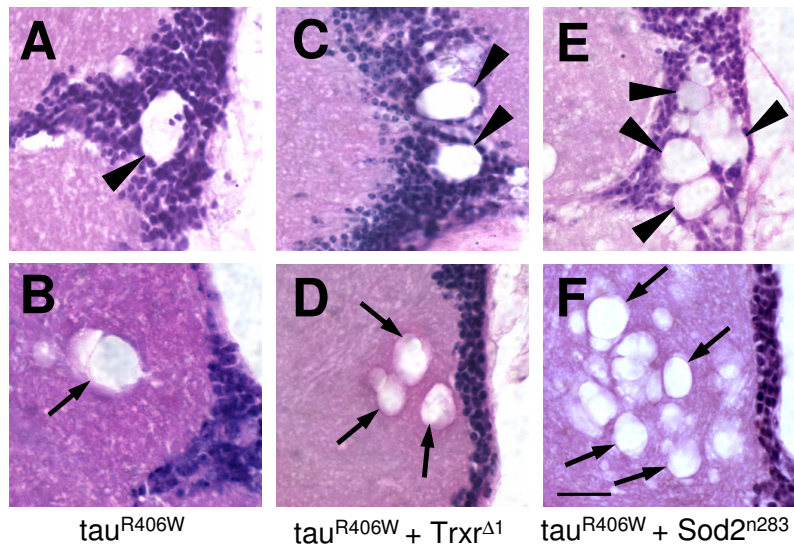

Supplemental Figure S2 (Dias-Santagata *et al.*)

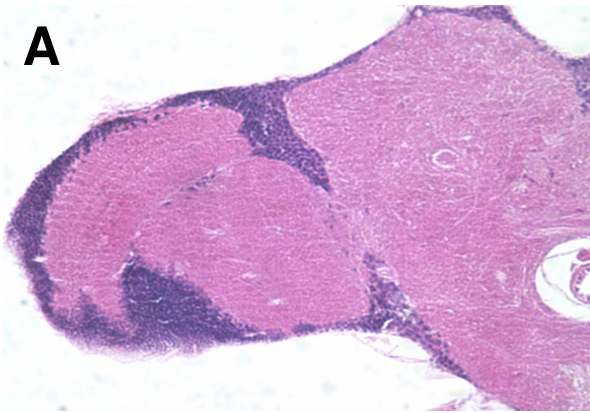

Trxr $\Delta$ 1

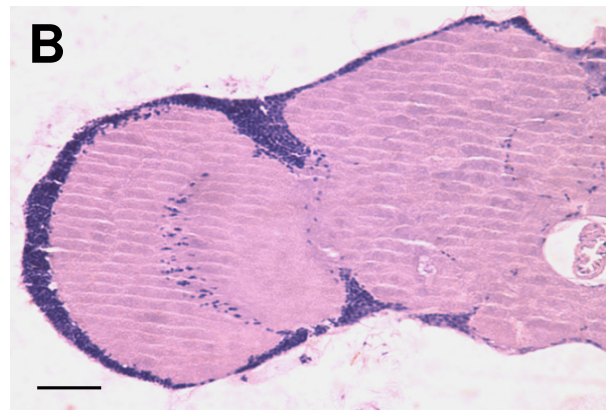

Sod2<sup>n283</sup>

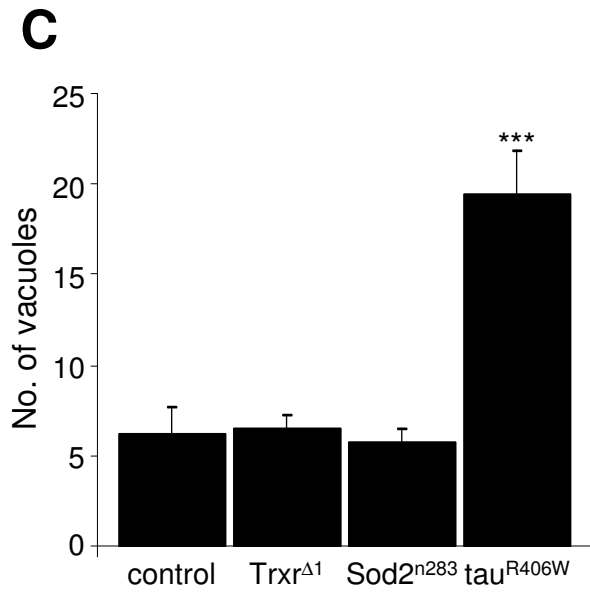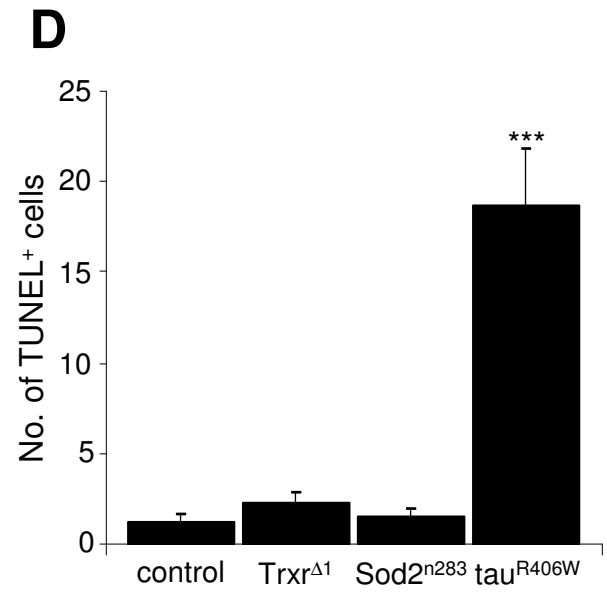

Supplement: JCI0728769sd.pdf [file JCI0728769sd.pdf]
